# Supplementary material
Source: Springer Nature journal article supplement (https://www.springermedizin.de/resource/supplementary/12891_2003_60_MOESM1_ESM.pdf/9510394)
Supplement: MOESM1 [file 9510394]

Name: \_\_\_\_\_

Date: \_\_\_\_\_

## PATIENT RATED WRIST EVALUATION

The questions below will help us understand how much difficulty you have had with your wrist in the past week. You will be describing your **average** wrist symptoms **over the past week** on a scale of 0-10. Please provide an answer for **ALL** questions. If you did not perform an activity, please **ESTIMATE** the pain or difficulty you would expect. If you have **never** performed the activity, you may leave it blank.

|                                                                                                                                                                                                                                                                                                                                                                                |         |   |   |   |   |   |   |   |   |            |    |
|--------------------------------------------------------------------------------------------------------------------------------------------------------------------------------------------------------------------------------------------------------------------------------------------------------------------------------------------------------------------------------|---------|---|---|---|---|---|---|---|---|------------|----|
| <b>1. PAIN</b>                                                                                                                                                                                                                                                                                                                                                                 |         |   |   |   |   |   |   |   |   |            |    |
| <p>Rate the <b>average</b> amount of pain in your wrist over the past week by circling the number that best describes your pain on a scale from 0-10. A zero (<b>0</b>) means that you <b>did not</b> have any pain and a <b>ten (10)</b> means that you had the <b>worst pain you have ever experienced</b> or that <b>you could not do the activity because of pain.</b></p> |         |   |   |   |   |   |   |   |   |            |    |
| <p>RATE YOUR PAIN: Sample Scale </p>                                                                                                                                                                                                                                                                                                                                           |         |   |   |   |   |   |   |   |   |            |    |
|                                                                                                                                                                                                                                                                                                                                                                                | 0       | 1 | 2 | 3 | 4 | 5 | 6 | 7 | 8 | 9          | 10 |
|                                                                                                                                                                                                                                                                                                                                                                                | No Pain |   |   |   |   |   |   |   |   | Worst Ever |    |
| At rest                                                                                                                                                                                                                                                                                                                                                                        | 0       | 1 | 2 | 3 | 4 | 5 | 6 | 7 | 8 | 9          | 10 |
| When doing a task with a repeated wrist movement                                                                                                                                                                                                                                                                                                                               | 0       | 1 | 2 | 3 | 4 | 5 | 6 | 7 | 8 | 9          | 10 |
| When lifting a heavy object                                                                                                                                                                                                                                                                                                                                                    | 0       | 1 | 2 | 3 | 4 | 5 | 6 | 7 | 8 | 9          | 10 |
| When it is at its worst                                                                                                                                                                                                                                                                                                                                                        | 0       | 1 | 2 | 3 | 4 | 5 | 6 | 7 | 8 | 9          | 10 |
| How often do you have pain?                                                                                                                                                                                                                                                                                                                                                    | 0       | 1 | 2 | 3 | 4 | 5 | 6 | 7 | 8 | 9          | 10 |
|                                                                                                                                                                                                                                                                                                                                                                                | Never   |   |   |   |   |   |   |   |   | Always     |    |

|                                                                                                                                                                                                                                                                                                                                                                                                                                                                                                                                          |               |   |   |   |   |   |   |   |   |              |    |
|------------------------------------------------------------------------------------------------------------------------------------------------------------------------------------------------------------------------------------------------------------------------------------------------------------------------------------------------------------------------------------------------------------------------------------------------------------------------------------------------------------------------------------------|---------------|---|---|---|---|---|---|---|---|--------------|----|
| <b>2. FUNCTION</b>                                                                                                                                                                                                                                                                                                                                                                                                                                                                                                                       |               |   |   |   |   |   |   |   |   |              |    |
| <b>A. SPECIFIC ACTIVITIES</b>                                                                                                                                                                                                                                                                                                                                                                                                                                                                                                            |               |   |   |   |   |   |   |   |   |              |    |
| <p>Rate the <b>amount of difficulty</b> you experienced performing each of the items listed below - over the past week, by circling the number that describes your difficulty on a scale of 0-10. A <b>zero (0)</b> means you did not experience any difficulty and a <b>ten (10)</b> means it was so difficult you were unable to do it at all.</p>                                                                                                                                                                                     |               |   |   |   |   |   |   |   |   |              |    |
| <p>Sample scale →</p>                                                                                                                                                                                                                                                                                                                                                                                                                                                                                                                    |               |   |   |   |   |   |   |   |   |              |    |
|                                                                                                                                                                                                                                                                                                                                                                                                                                                                                                                                          | 0             | 1 | 2 | 3 | 4 | 5 | 6 | 7 | 8 | 9            | 10 |
|                                                                                                                                                                                                                                                                                                                                                                                                                                                                                                                                          | No Difficulty |   |   |   |   |   |   |   |   | Unable To Do |    |
| Turn a door knob using my affected hand                                                                                                                                                                                                                                                                                                                                                                                                                                                                                                  | 0             | 1 | 2 | 3 | 4 | 5 | 6 | 7 | 8 | 9            | 10 |
| Cut meat using a knife in my affected hand                                                                                                                                                                                                                                                                                                                                                                                                                                                                                               | 0             | 1 | 2 | 3 | 4 | 5 | 6 | 7 | 8 | 9            | 10 |
| Fasten buttons on my shirt                                                                                                                                                                                                                                                                                                                                                                                                                                                                                                               | 0             | 1 | 2 | 3 | 4 | 5 | 6 | 7 | 8 | 9            | 10 |
| Use my affected hand to push up from a chair                                                                                                                                                                                                                                                                                                                                                                                                                                                                                             | 0             | 1 | 2 | 3 | 4 | 5 | 6 | 7 | 8 | 9            | 10 |
| Carry a 10lb object in my affected hand                                                                                                                                                                                                                                                                                                                                                                                                                                                                                                  | 0             | 1 | 2 | 3 | 4 | 5 | 6 | 7 | 8 | 9            | 10 |
| Use bathroom tissue with my affected hand                                                                                                                                                                                                                                                                                                                                                                                                                                                                                                | 0             | 1 | 2 | 3 | 4 | 5 | 6 | 7 | 8 | 9            | 10 |
| <b>B. USUAL ACTIVITIES</b>                                                                                                                                                                                                                                                                                                                                                                                                                                                                                                               |               |   |   |   |   |   |   |   |   |              |    |
| <p>Rate the <b>amount of difficulty</b> you experienced performing your <b>usual</b> activities in each of the areas listed below, over the past week, by circling the number that best describes your difficulty on a scale of 0-10. By "usual activities", we mean the activities you performed <b>before</b> you started having a problem with your wrist. A <b>zero (0)</b> means that you did not experience any difficulty and a <b>ten (10)</b> means it was so difficult you were unable to do any of your usual activities.</p> |               |   |   |   |   |   |   |   |   |              |    |
| Personal care activities (dressing, washing)                                                                                                                                                                                                                                                                                                                                                                                                                                                                                             | 0             | 1 | 2 | 3 | 4 | 5 | 6 | 7 | 8 | 9            | 10 |
| Household work (cleaning, maintenance)                                                                                                                                                                                                                                                                                                                                                                                                                                                                                                   | 0             | 1 | 2 | 3 | 4 | 5 | 6 | 7 | 8 | 9            | 10 |
| Work (your job or usual everyday work)                                                                                                                                                                                                                                                                                                                                                                                                                                                                                                   | 0             | 1 | 2 | 3 | 4 | 5 | 6 | 7 | 8 | 9            | 10 |
| Recreational activities                                                                                                                                                                                                                                                                                                                                                                                                                                                                                                                  | 0             | 1 | 2 | 3 | 4 | 5 | 6 | 7 | 8 | 9            | 10 |
